# Supplementary material
Source: PubMed Central journal article supplement (PMC3635233)
Supplement: ismej2012161x2.pdf [file ismej2012161x2.pdf]

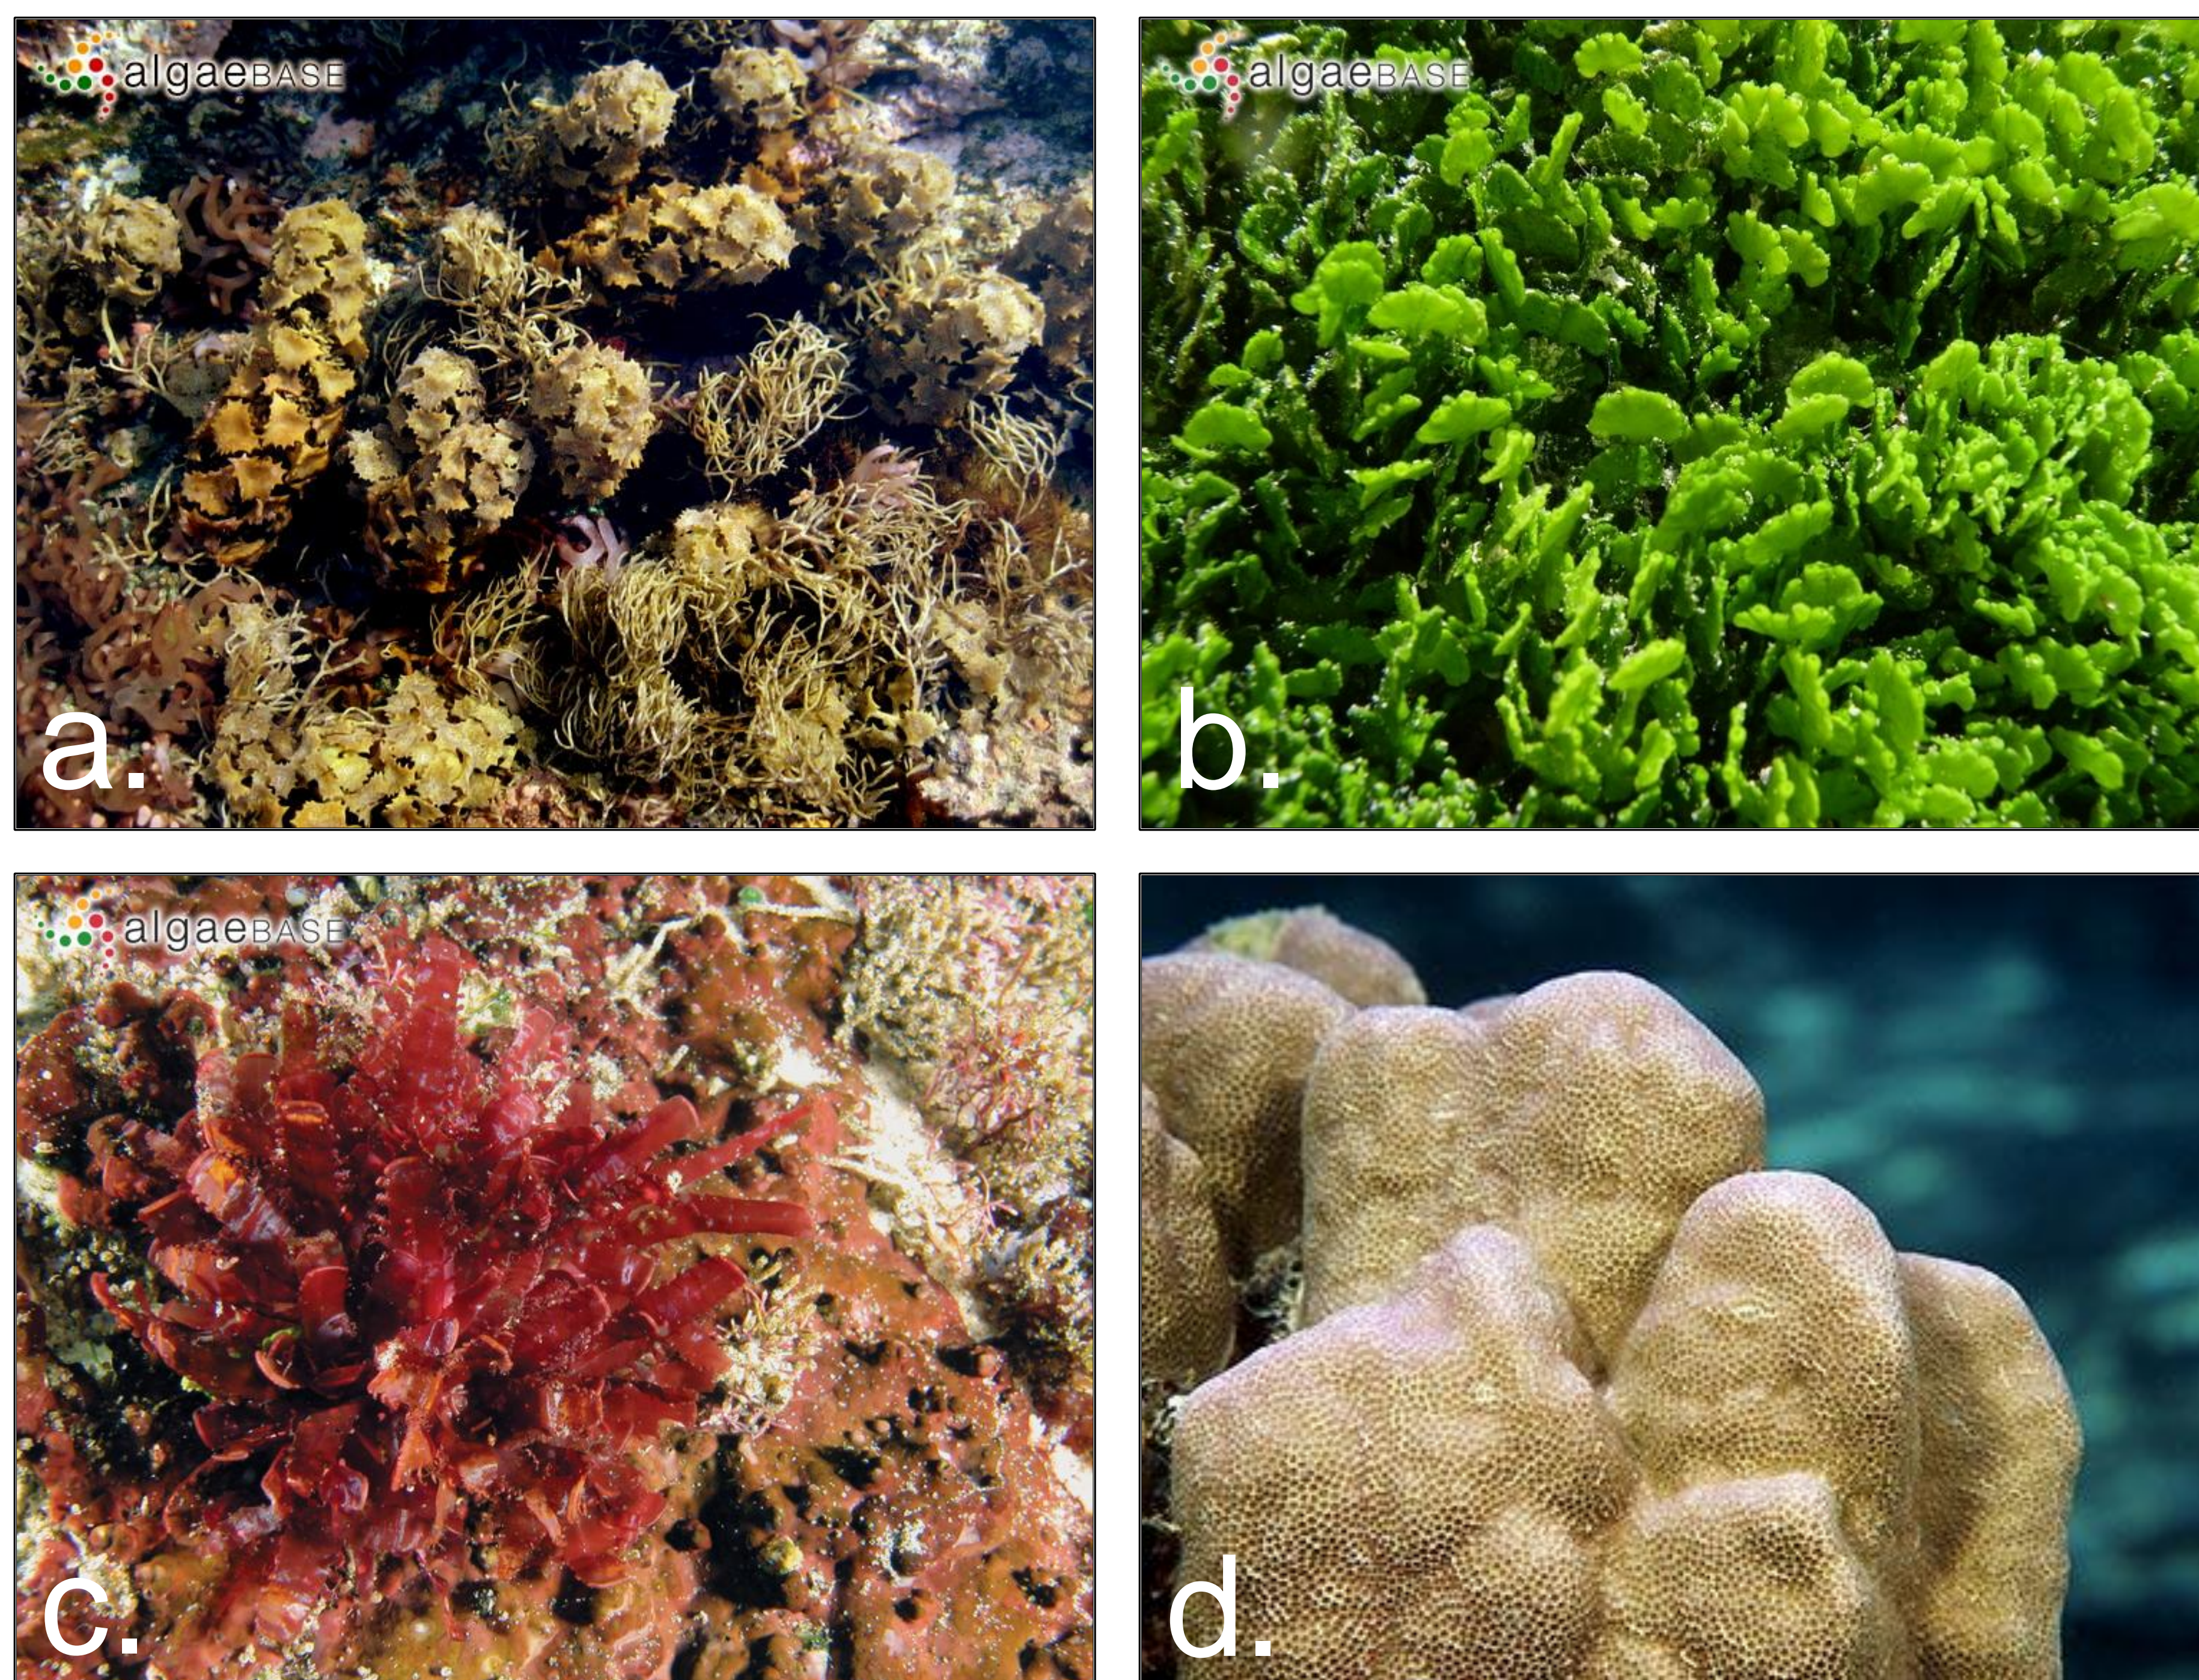

**Supplementary Figure S1. Example photographs of the four benthic primary producers found in lagoonal reefs on the north shore of Moorea, French Polynesia used to produce exudates in this study.** Species are as follows: a) *Turbinaria ornata* – Ochrophyta; b) *Halimeda opuntia* – Chlorophyta; c) *Amansia rhodantha* – Rhodophyta; *Porites lobata* - Cnidaria. Photos a-c sourced from AlgaeBase: Guiry, M.D. & Guiry, G.M. 2011. <http://www.algaebase.org>, National University of Ireland, Galway; photo d sourced from MCR-LTER at <http://mcr.lternet.edu/education> with respective copyrights: a) Eric Coppejans( [eric.coppejans@ugent.be](mailto:eric.coppejans@ugent.be)); b) John Huisman ([j.huisman@murdoch.edu.au](mailto:j.huisman@murdoch.edu.au)); c) Heroen Verbruggen ([heroen.verbruggen@gmail.com](mailto:heroen.verbruggen@gmail.com)); d) Matthew Meier ([matt@matthewmeierphoto.com](mailto:matt@matthewmeierphoto.com)).

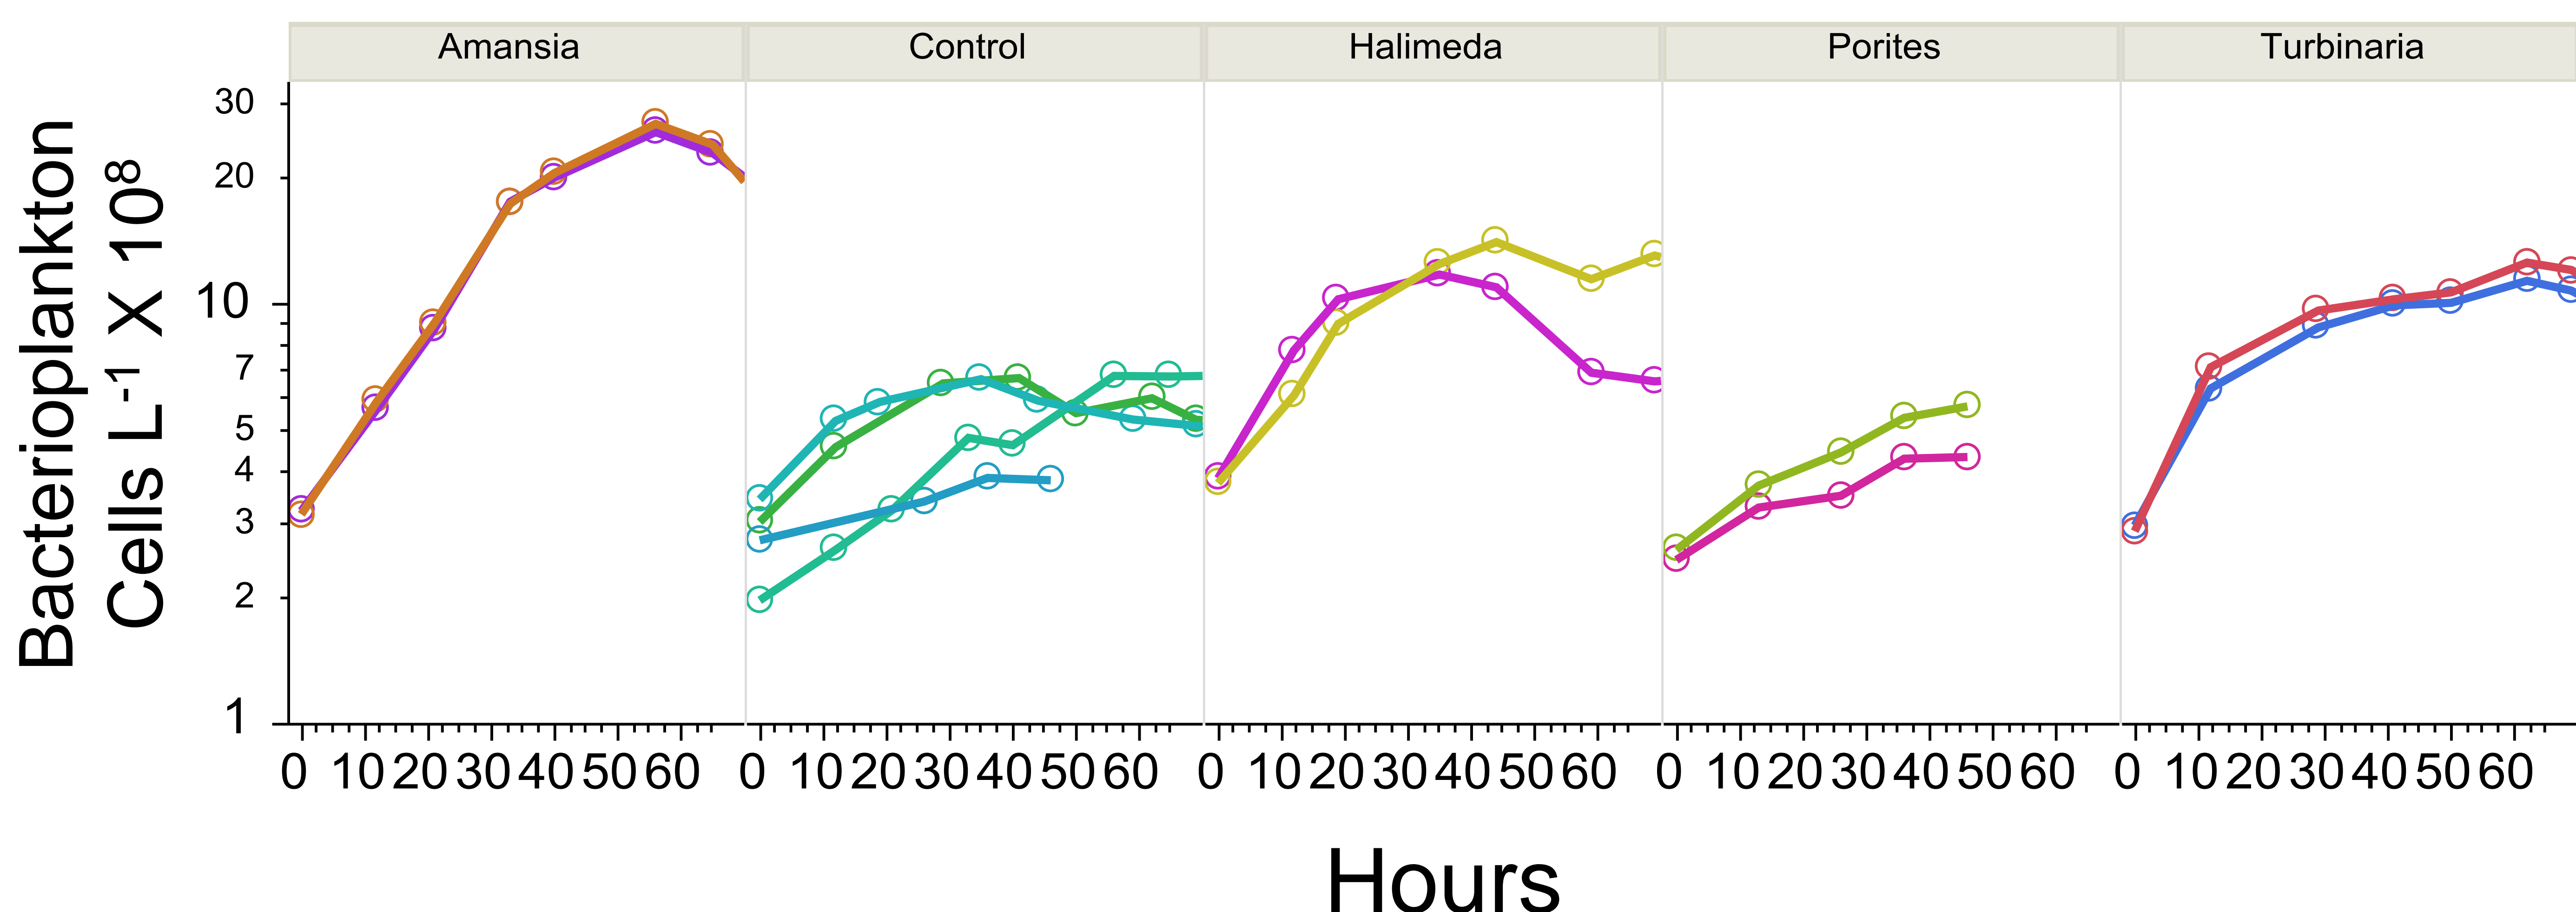

**Supplementary Figure S2. Replicate bacterioplankton growth curves over time in each treatment.**

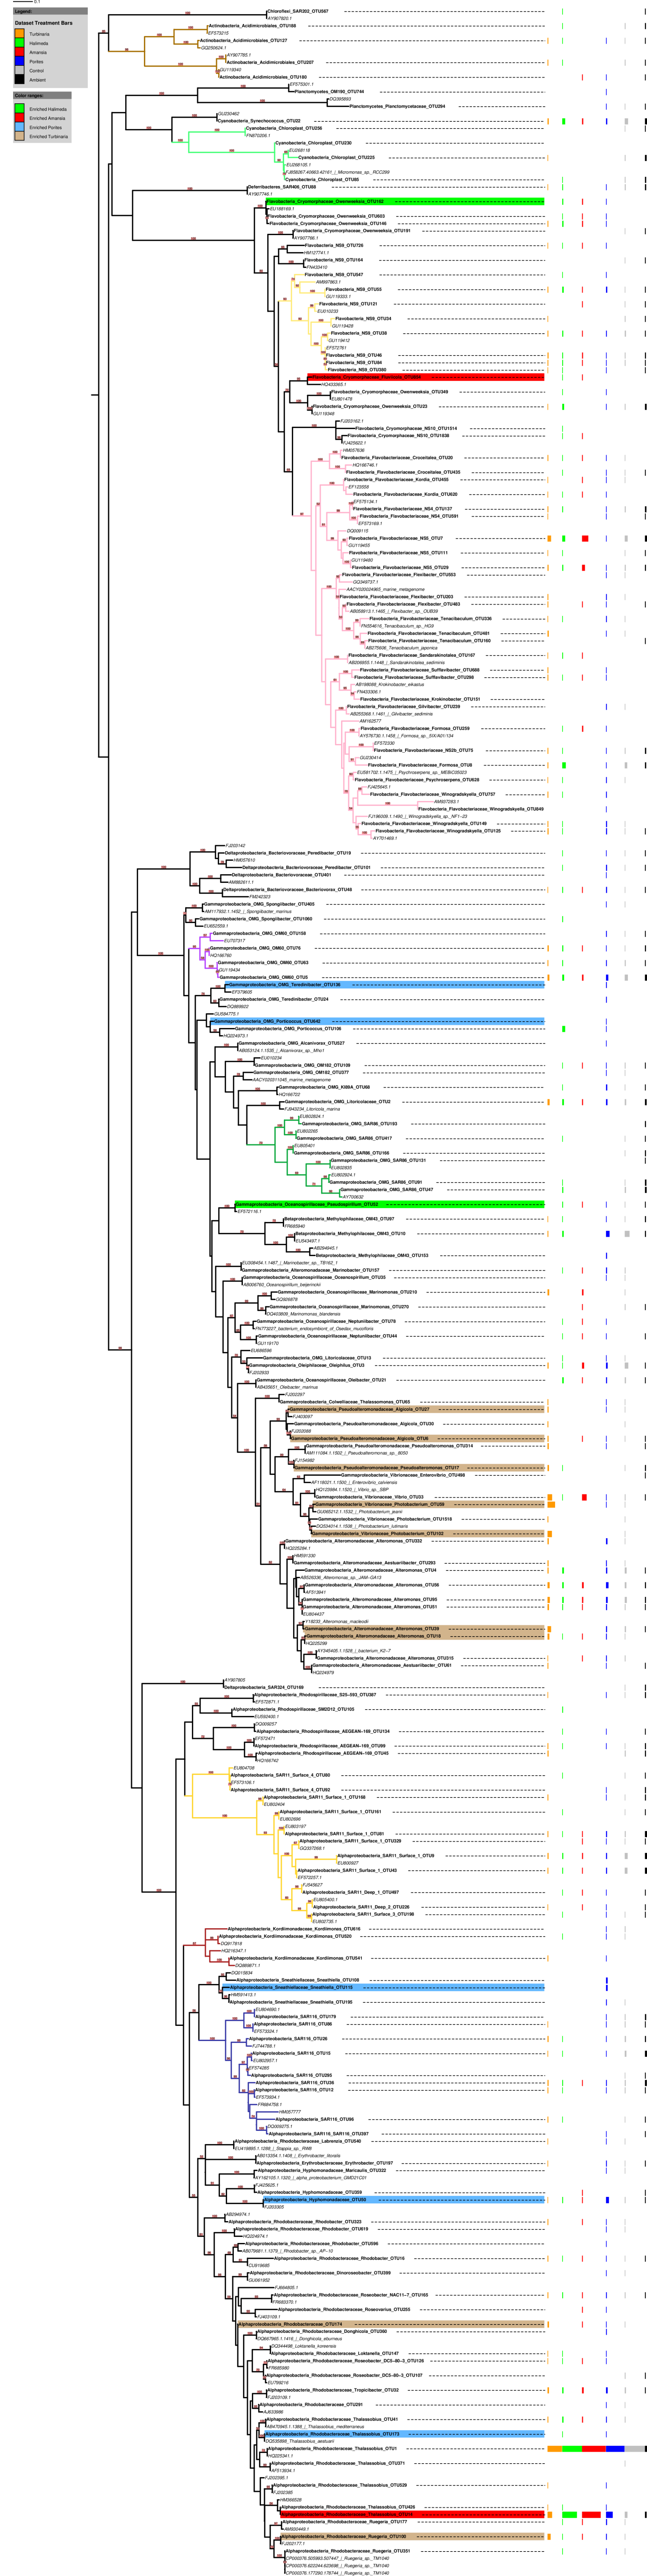

**Supplementary Figures S3. Complete phylogeny of all OTUs analyzed in this study and nearest neighbors.** Bars at right of each OTU give relative abundance of each taxa in each treatment. Note that this is downloadable as a separate file for full resolution.

| Turbinaria                                                 |       | Halimeda                                                   |       |
|------------------------------------------------------------|-------|------------------------------------------------------------|-------|
| Alphaproteobacteria_Rhodobacteraceae_uncultured_OTU1       | 20.2% | Alphaproteobacteria_Rhodobacteraceae_uncultured_OTU1       | 27.8% |
| Gammaproteobacteria_Vibrionaceae_Photobacterium_OTU59      | 10.0% | Alphaproteobacteria_Rhodobacteraceae_Thalassobius_OTU14    | 20.6% |
| Alphaproteobacteria_Rhodobacteraceae_Thalassobius_OTU14    | 5.8%  | Flavobacteria_Flavobacteriaceae_Formosa_OTU8               | 4.5%  |
| Gammaproteobacteria_Vibrionaceae_Vibrio_OTU33              | 5.8%  | Gammaproteobacteria_Alteromonadaceae_Porticoccus_OTU106    | 3.5%  |
| Gammaproteobacteria_Vibrionaceae_Photobacterium_OTU102     | 5.3%  | Flavobacteria_Flavobacteriaceae_NS5_marine_group_OTU7      | 3.5%  |
| Flavobacteria_Flavobacteriaceae_NS5_marine_group_OTU7      | 4.1%  | Cyanobacteria_Synechococcus__OTU22                         | 3.3%  |
| Gammaproteobacteria_Alteromonadaceae_Alteromonas_OTU39     | 4.1%  | Flavobacteria_Cryomorphaceae_Owenweeksia_OTU23             | 1.8%  |
| Alphaproteobacteria_Rhodobacteraceae_Ruegeria_OTU100       | 3.6%  | Gammaproteobacteria_Alteromonadaceae_OM60(NOR5)_clade_OTU5 | 1.8%  |
| Gammaproteobacteria_Alteromonadaceae_Alteromonas_OTU95     | 2.5%  | Gammaproteobacteria_Alteromonadaceae_Alteromonas_OTU4      | 1.6%  |
| Gammaproteobacteria_Alteromonadaceae_Alteromonas_OTU56     | 2.2%  | Gammaproteobacteria_Litoricolaceae_Litoricola_OTU2         | 1.5%  |
| Gammaproteobacteria_Litoricolaceae_Litoricola_OTU2         | 2.0%  | Gammaproteobacteria_Oceanospirillaceae_Oceanobacter_OTU21  | 1.4%  |
| Gammaproteobacteria_Alteromonadaceae_Alteromonas_OTU18     | 1.8%  | Flavobacteria_NS9_marine_group__OTU55                      | 1.4%  |
| Gammaproteobacteria_Alteromonadaceae_OM60(NOR5)_clade_OTU5 | 1.7%  | Betaproteobacteria_Methylophilaceae_OM43_clade_OTU10       | 1.3%  |
| Gammaproteobacteria_Oceanospirillaceae_Marinomonas_OTU210  | 1.3%  | Gammaproteobacteria_Alteromonadaceae_Alteromonas_OTU95     | 1.3%  |
| Alphaproteobacteria_Rhodobacteraceae_Albimonas_OTU174      | 1.2%  | Gammaproteobacteria_Alteromonadaceae_Alteromonas_OTU56     | 1.2%  |
|                                                            |       |                                                            |       |
| Amansia                                                    |       | Porites                                                    |       |
| Alphaproteobacteria_Rhodobacteraceae_uncultured_OTU1       | 33.5% | Alphaproteobacteria_Rhodobacteraceae_uncultured_OTU1       | 26.2% |
| Alphaproteobacteria_Rhodobacteraceae_Thalassobius_OTU14    | 26.2% | Alphaproteobacteria_Rhodobacteraceae_Thalassobius_OTU14    | 9.0%  |
| Flavobacteria_Flavobacteriaceae_NS5_marine_group_OTU7      | 8.2%  | Betaproteobacteria_Methylophilaceae_OM43_clade_OTU10       | 4.3%  |
| Gammaproteobacteria_Vibrionaceae_Vibrio_OTU33              | 5.8%  | Alphaproteobacteria_Hyphomonadaceae_uncultured_OTU50       | 3.5%  |
| Flavobacteria_Flavobacteriaceae_NS5_marine_group_OTU29     | 3.2%  | Gammaproteobacteria_Alteromonadaceae_Alteromonas_OTU56     | 2.8%  |
| Gammaproteobacteria_Oleiphilaceae_Oleiphilus_OTU3          | 2.2%  | Gammaproteobacteria_Alteromonadaceae_OM60(NOR5)_clade_OTU5 | 2.6%  |
| Alphaproteobacteria_Rhodobacteraceae_Tropicibacter_OTU32   | 1.5%  | Alphaproteobacteria_Rhodobacteraceae_Tropicibacter_OTU32   | 1.8%  |
| Gammaproteobacteria_Alteromonadaceae_Alteromonas_OTU56     | 1.4%  | Gammaproteobacteria_Alteromonadaceae_Alteromonas_OTU95     | 1.7%  |
| Gammaproteobacteria_Alteromonadaceae_OM60(NOR5)_clade_OTU5 | 1.2%  | Gammaproteobacteria_Oleiphilaceae_Oleiphilus_OTU3          | 1.6%  |
| Gammaproteobacteria_Oceanospirillaceae_Marinomonas_OTU210  | 1.0%  | Alphaproteobacteria_Sneathiellaceae_Sneathiella_OTU108     | 1.6%  |
| Cyanobacteria_Synechococcus__OTU22                         | 1.0%  | Alphaproteobacteria_Sneathiellaceae_Sneathiella_OTU115     | 1.5%  |
| Gammaproteobacteria_Alteromonadaceae_Alteromonas_OTU95     | 1.0%  | Gammaproteobacteria_Litoricolaceae_Litoricola_OTU2         | 1.4%  |
| Flavobacteria_Flavobacteriaceae_Mesoflavibacter_OTU259     | 0.9%  | Gammaproteobacteria_Alteromonadaceae__OTU332               | 1.3%  |
| Gammaproteobacteria_Litoricolaceae_Litoricola_OTU2         | 0.7%  | Cyanobacteria_Synechococcus__OTU22                         | 1.1%  |
| Flavobacteria_Cryomorphaceae_Owenweeksia_OTU162            | 0.6%  | Gammaproteobacteria_KI89A_clade_OTU68                      | 1.0%  |
|                                                            |       |                                                            |       |
| Control                                                    |       | Ambient                                                    |       |
| Alphaproteobacteria_Rhodobacteraceae_uncultured_OTU1       | 28.5% | Cyanobacteria_Synechococcus__OTU22                         | 23.2% |
| Betaproteobacteria_Methylophilaceae_OM43_clade_OTU10       | 6.1%  | Alphaproteobacteria_SAR11_clade_Pelagibacter_OTU9          | 10.2% |
| Gammaproteobacteria_Oleiphilaceae_Oleiphilus_OTU3          | 4.2%  | Alphaproteobacteria_Rhodobacteraceae_uncultured_OTU1       | 8.0%  |
| Cyanobacteria_Synechococcus__OTU22                         | 4.0%  | Alphaproteobacteria_SAR11_clade_Surface_1_OTU43            | 7.1%  |
| Gammaproteobacteria_Alteromonadaceae_OM60(NOR5)_clade_OTU5 | 3.7%  | Alphaproteobacteria_SAR11_clade_Surface_1_OTU81            | 2.3%  |
| Flavobacteria_Flavobacteriaceae_NS5_marine_group_OTU7      | 3.5%  | Flavobacteria_Flavobacteriaceae_NS5_marine_group_OTU7      | 2.1%  |
| Alphaproteobacteria_SAR11_clade_Pelagibacter_OTU9          | 3.5%  | Gammaproteobacteria_Alteromonadaceae_OM60(NOR5)_clade_OTU5 | 1.9%  |
| Alphaproteobacteria_SAR11_clade_Surface_1_OTU43            | 3.1%  | Alphaproteobacteria_SAR116_clade__OTU15                    | 1.8%  |
| Alphaproteobacteria_Rhodobacteraceae_Thalassobius_OTU14    | 3.1%  | Alphaproteobacteria_SAR116_clade__OTU36                    | 1.7%  |
| Flavobacteria_Flavobacteriaceae_Formosa_OTU8               | 2.7%  | Gammaproteobacteria_Litoricolaceae_Litoricola_OTU2         | 1.5%  |
| Gammaproteobacteria_Alteromonadaceae_Alteromonas_OTU95     | 2.2%  | Flavobacteria_Cryomorphaceae_Owenweeksia_OTU23             | 1.4%  |
| Gammaproteobacteria_Alteromonadaceae_Alteromonas_OTU4      | 1.8%  | Alphaproteobacteria_Rhodobacteraceae_Thalassobius_OTU14    | 1.4%  |
| Gammaproteobacteria_Alteromonadaceae_Alteromonas_OTU56     | 1.4%  | Gammaproteobacteria_SAR86_clade__OTU47                     | 1.3%  |
| Alphaproteobacteria_SAR116_clade__OTU15                    | 1.4%  | Cyanobacteria_Chloroplast__OTU225                          | 1.3%  |
| Gammaproteobacteria_Litoricolaceae_Litoricola_OTU2         | 1.3%  | Gammaproteobacteria_SAR86_clade__OTU91                     | 1.2%  |

**Supplementary Table S4. Fifteen most common OTUs in each treatment, with mean relative abundances.** A set of six OTUs which were common to most treatments are color-coded for ease of visualization of shifts in dominance from Ambient Waters to experimental treatments.



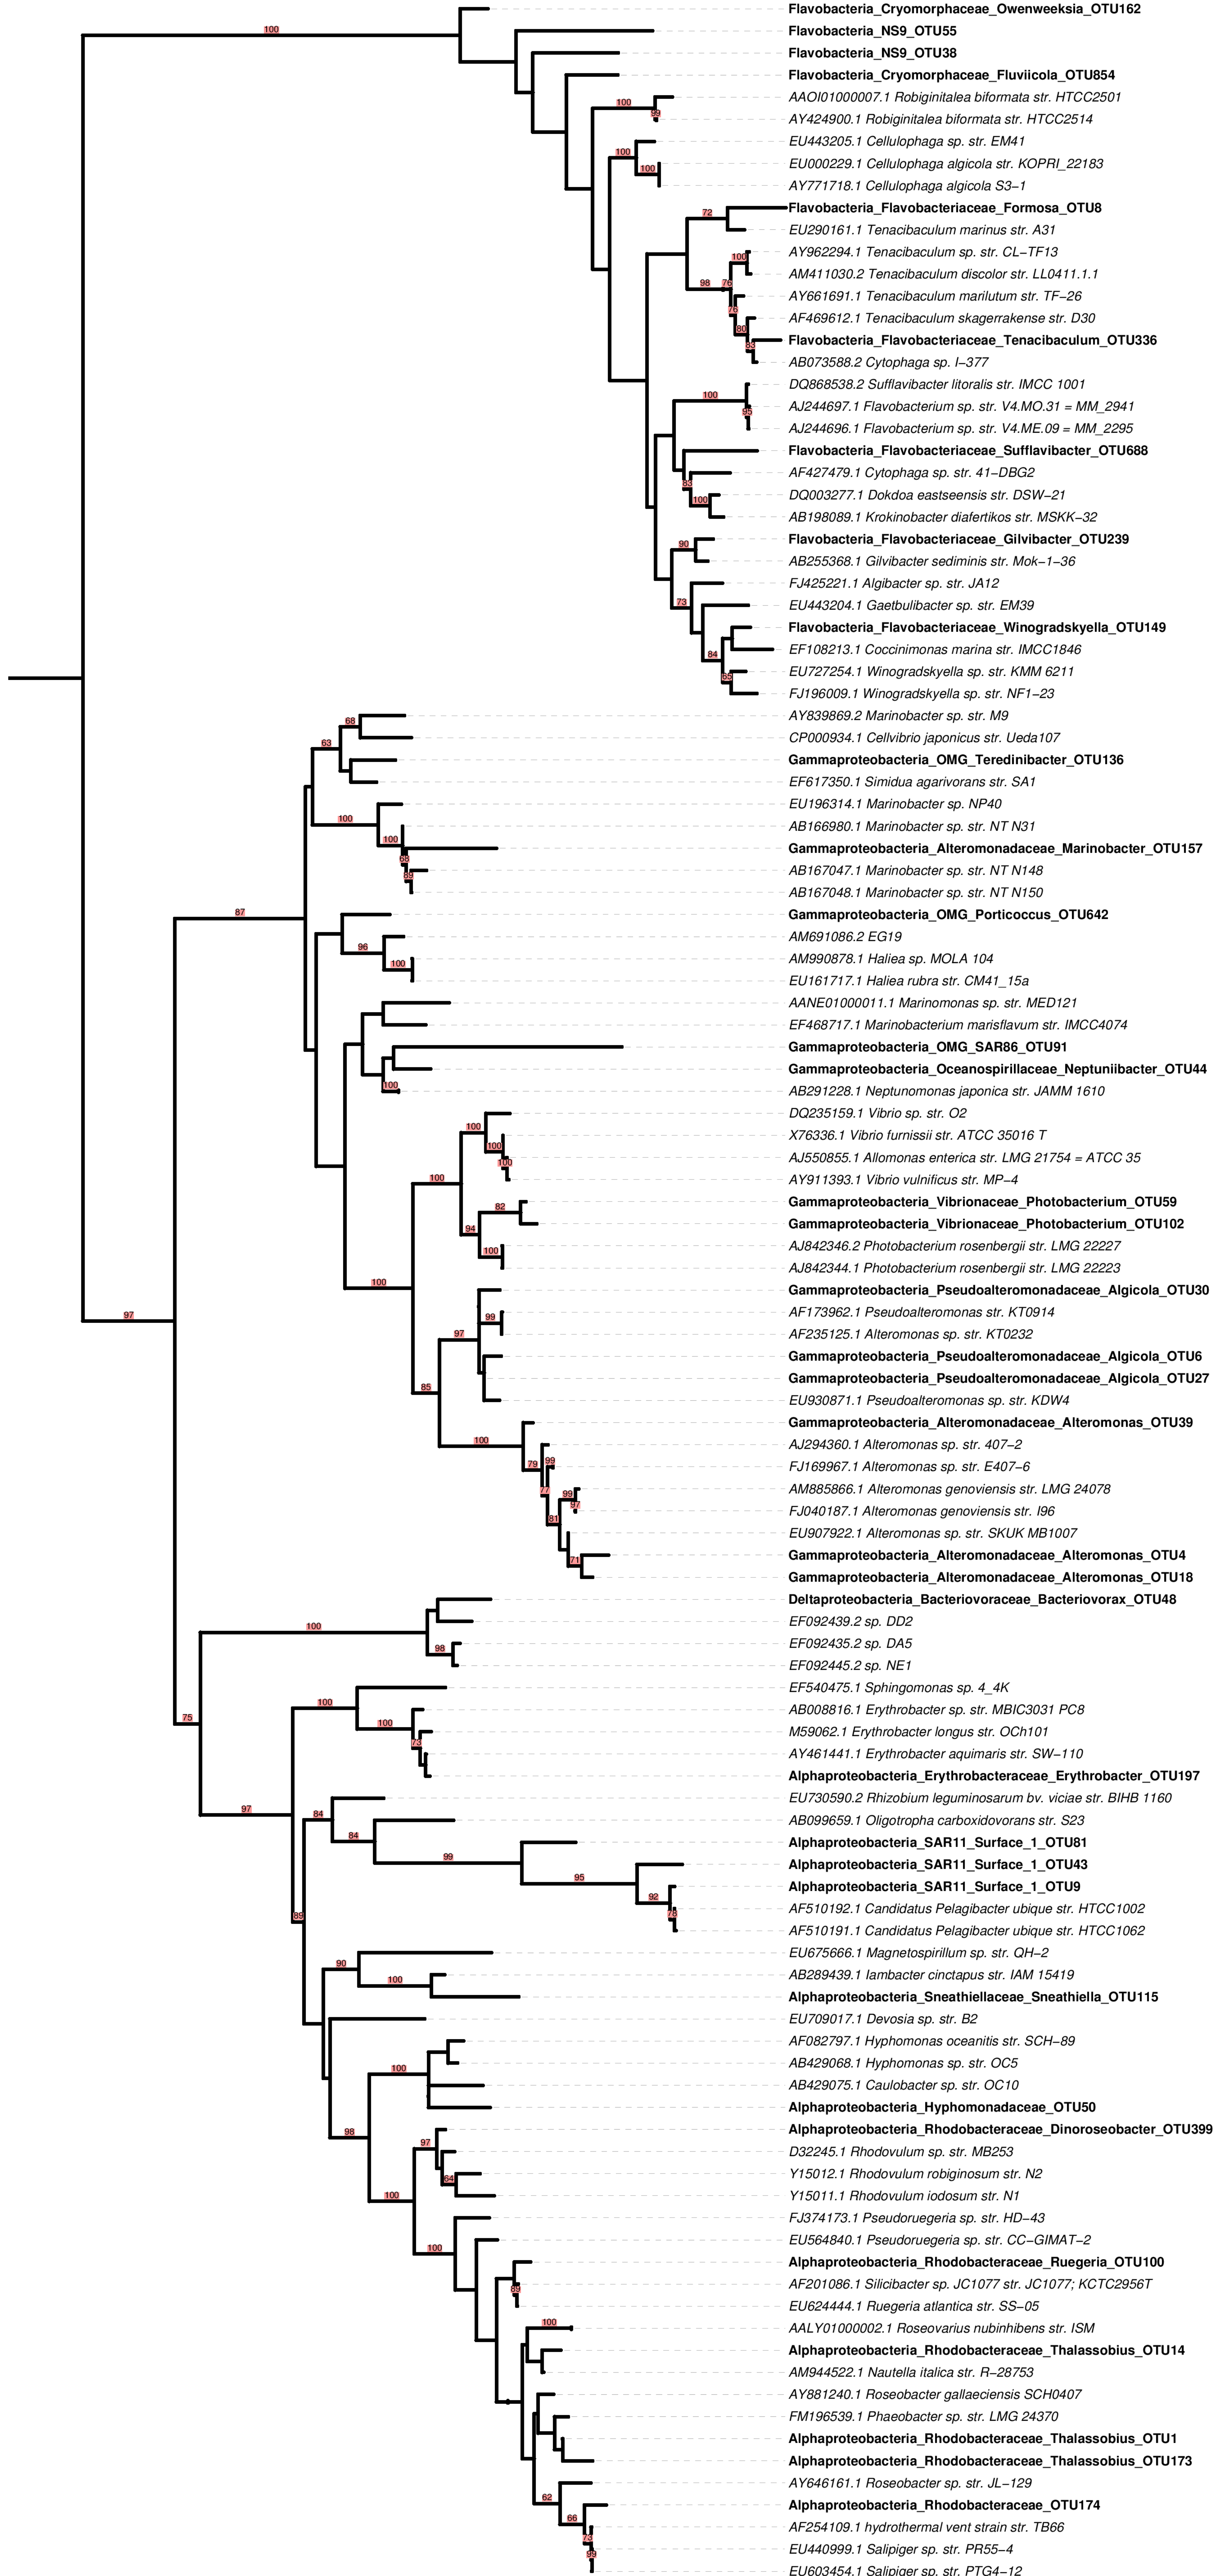

**Supplementary Figure S6.**  
**Maximum-likelihood**  
**phylogeny of selected OTUs**  
**differing significantly among**  
**treatments and their nearest**  
**cultured isolate neighbors.**

|                                                          |
|----------------------------------------------------------|
| Flavobacteria_Flavobacteriaceae_Tenacibaculum_OTU336     |
| Flavobacteria_Flavobacteriaceae_Winogradskyella_OTU149   |
| Flavobacteria_NS9_marine_group_OTU55                     |
| Alphaproteobacteria_Rhodobacteraceae_uncultured_OTU1     |
| Alphaproteobacteria_Rhodobacteraceae_uncultured_OTU177   |
| Deltaproteobacteria_Bacteriovoraceae_Bacteriovorax_OTU48 |
| Gammaproteobacteria_Alteromonadaceae_Alteromonas_OTU4    |
| Gammaproteobacteria_Alteromonadaceae_Marinobacter_OTU157 |

**Supplementary Table S7.  
Eight taxa which were  
enriched in all dilution  
culture incubations (exudate-  
amendments and controls)  
relative to ambient waters.**

| Treatment Code | Replicate Bottle | Start Date 2010 | Multiplex Barcode | Sequence Reads | Observed OTUs | CatchAll Richness | Chao1 Richness | Shannon Diversity | Simpson Diversity* |
|----------------|------------------|-----------------|-------------------|----------------|---------------|-------------------|----------------|-------------------|--------------------|
| Turbinaria     | 1                | 9/8             | ACACGTCA          | 1393           | 171           | 518               | 305            | 3.64              | 0.94               |
| Turbinaria     | 2                | 9/8             | ACACGTGT          | 213            | 59            | 127               | 84             | 3.41              | 0.95               |
| Turbinaria     | 3                | 9/8             | ACACTCTC          | 377            | 73            | 262               | 159            | 3.05              | 0.90               |
| Amansia        | 1                | 9/9             | ACACTGTG          | 574            | 50            | 134               | 123            | 2.12              | 0.78               |
| Amansia        | 2                | 9/9             | ACAGACAG          | 187            | 30            | 82                | 61             | 2.09              | 0.78               |
| Amansia        | 3                | 9/9             | ACAGAGAC          | 515            | 66            | 271               | 162            | 2.38              | 0.82               |
| Halimeda       | 1                | 9/10            | ACAGCTCA          | 796            | 121           | 304               | 187            | 3.27              | 0.91               |
| Halimeda       | 2                | 9/10            | ACAGCTGT          | 502            | 68            | 143               | 104            | 2.75              | 0.83               |
| Halimeda       | 3                | 9/10            | ACAGGAGT          | 865            | 104           | 280               | 276            | 2.72              | 0.83               |
| Porites        | 1                | 9/13            | ACAGGTGA          | 1157           | 202           | 1351              | 530            | 3.90              | 0.93               |
| Porites        | 2                | 9/13            | ACAGTCAC          | 995            | 154           | 518               | 320            | 3.57              | 0.90               |
| Porites        | 3                | 9/13            | ACAGTGAG          | 1030           | 190           | 560               | 361            | 3.58              | 0.91               |
| Control        | 1                | 9/8             | ACACTCAG          | 154            | 32            | 47                | 45             | 2.84              | 0.91               |
| Control        | 2                | 9/9             | ACAGACTC          | 334            | 51            | 100               | 196            | 2.61              | 0.83               |
| Control        | 3                | 9/10            | ACAGGACA          | 598            | 88            | 259               | 163            | 3.18              | 0.87               |
| Control        | 4                | 9/13            | ACAGTCTG          | 873            | 176           | 445               | 358            | 3.98              | 0.95               |
| Ambient        | 1                | 9/8             | ACACTGAC          | 79             | 33            | 66                | 57             | 3.05              | 0.94               |
| Ambient        | 2                | 9/9             | ACAGAGTG          | 261            | 70            | 217               | 211            | 3.15              | 0.91               |
| Ambient        | 3                | 9/10            | ACAGGTCT          | 1061           | 150           | 616               | 378            | 3.41              | 0.90               |
| Ambient        | 4                | 9/10            | ACACGACT          | 208            | 56            | 186               | 100            | 3.33              | 0.94               |
| Ambient        | 5                | 9/12            | ACACGAGA          | 405            | 112           | 523               | 283            | 3.13              | 0.85               |
| Ambient        | 6                | 9/13            | ACAGTGTC          | 464            | 165           | 659               | 540            | 3.83              | 0.92               |

**Supplementary Table S8. Sequence reads, observed OTUs, diversity indices, and richness estimates for each sample.** Multiplex barcodes are listed to associate each sequence set with the SRA Accession. \*Simpson Diversity here is calculated as 1-D.

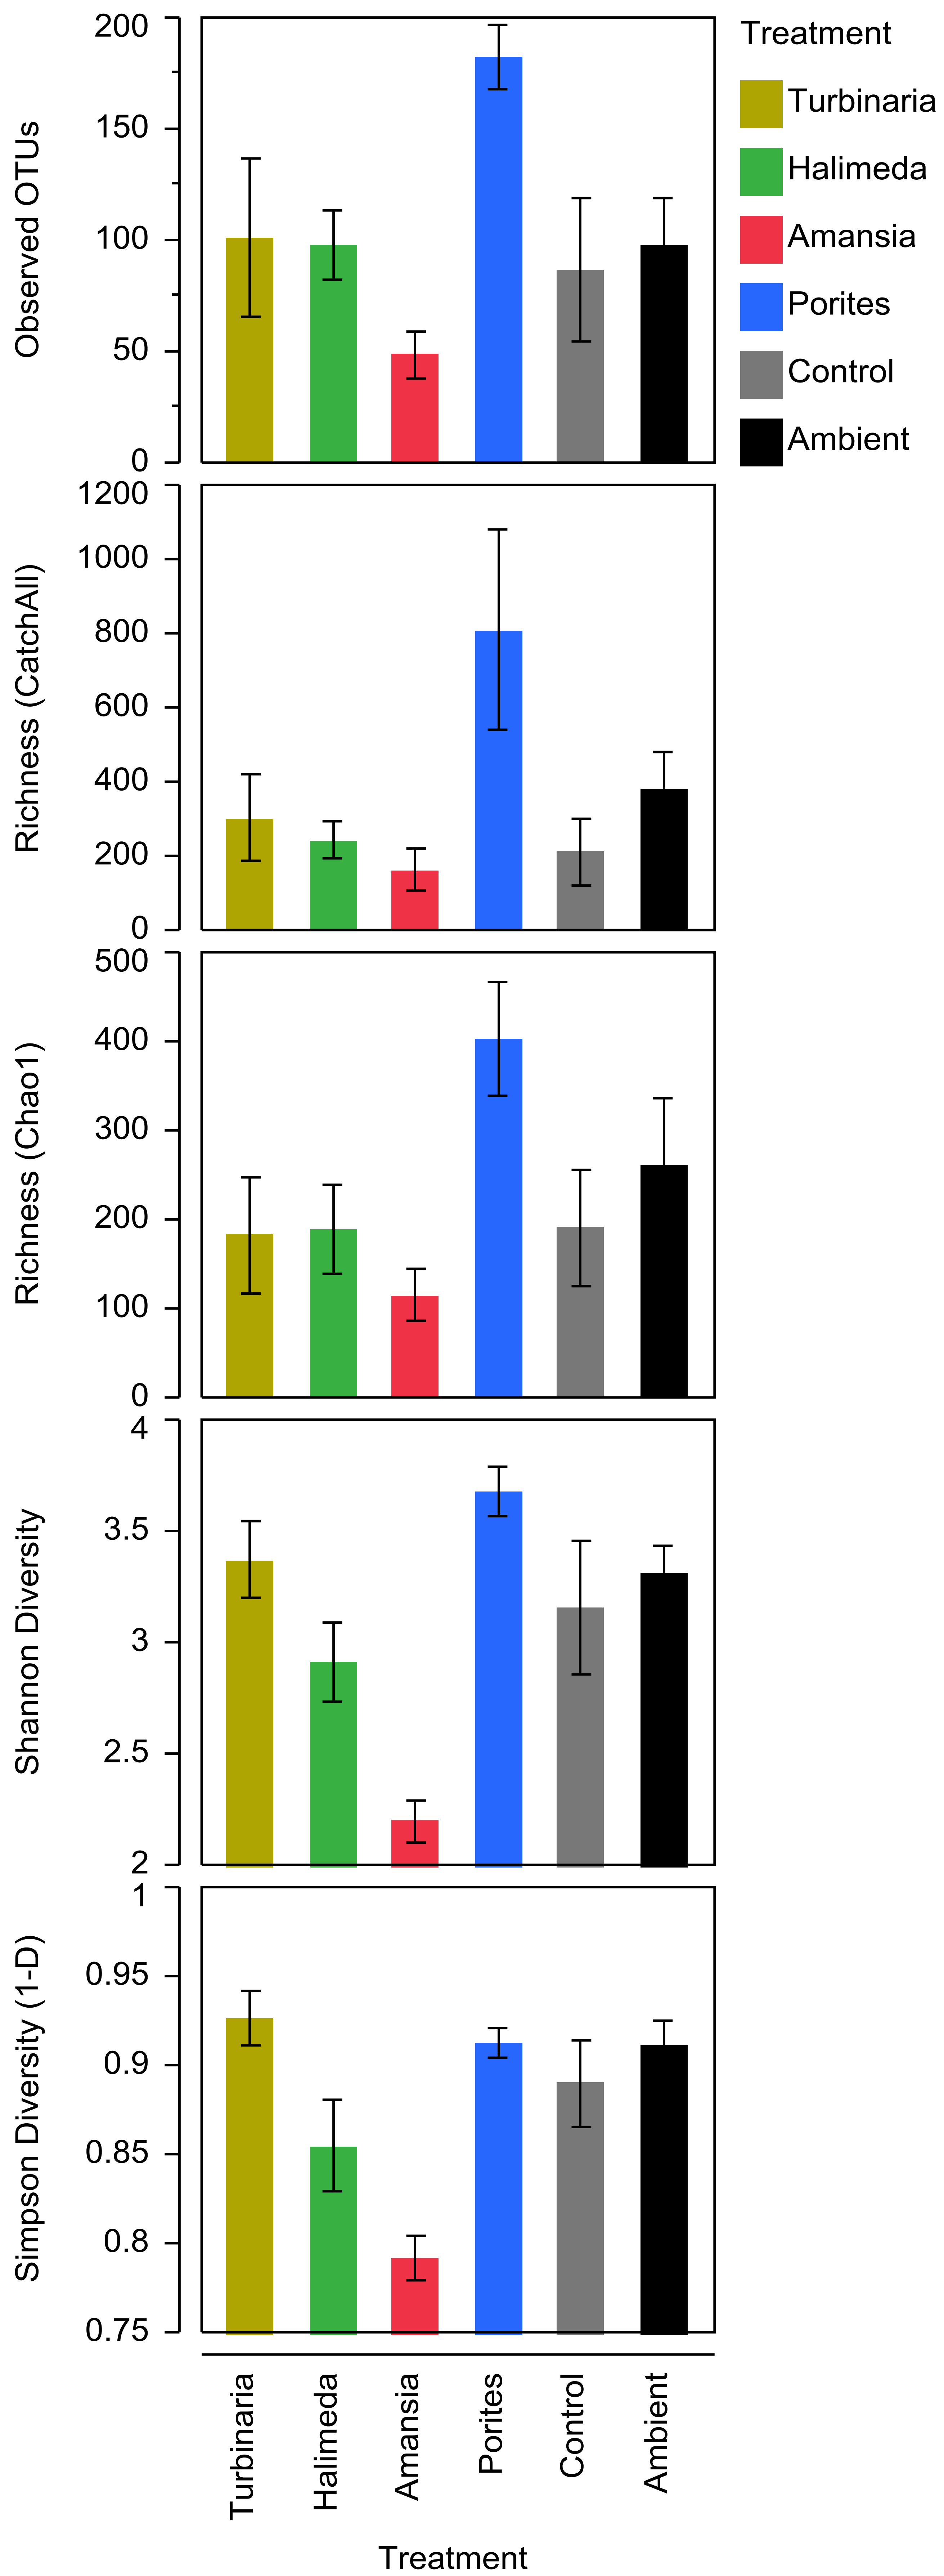

**Supplementary Figure S9: Mean OTU diversity indices among treatments.** Whiskers represent one standard error of the mean. Data are listed in Table S8.
